# Supplementary material for: The polarization-dependent anisotropic Raman response of few-layer and bulk WTe2under different excitation wavelengths
Source: Royal Society of Chemistry journal article supplement (doi:10.1039/c6ra23687a), 2016-01-01
Supplement: c6ra23687a1.pdf [file c6ra23687a1.pdf]

Electronic Supplementary information for

# The Polarization-Dependent Anisotropic Raman Response of Few-Layer and Bulk $\text{WTe}_2$ under Different Excitation Wavelengths

Qingjun Song,<sup>a, b</sup> Haifeng Wang,<sup>c, d</sup> Xiaolong Xu,<sup>a, b</sup> Xingchen Pan,<sup>c, d</sup> Yilun Wang,<sup>a, b</sup> Fengqi  
Song,<sup>c, d</sup> Xiangang Wan,<sup>c, d\*</sup> and Lun Dai<sup>a, b\*</sup>

---

<sup>a</sup>State Key Lab for Mesoscopic Physics and School of Physics, Peking University, Beijing 100871, China.

<sup>b</sup>Collaborative Innovation Center of Quantum Matter, Beijing 100871, China.

<sup>c</sup>National Laboratory of Solid State Microstructures, College of Physics, Nanjing University, Nanjing 210093, China.

<sup>d</sup>Collaborative Innovation Center of Advanced Microstructures, Nanjing University, Nanjing 210093, China.

\* E-mail: xgwan@nju.edu.cn, lundai@pku.edu.cn

**Table S1.** Selection rules for intermediate states  $m_1$  and  $m_2$  for a given initial state, and for polarization vector  $aa$  or  $bb$  which both correspond to the excitation of  $A_g$  ( $A'$ ,  $A_1$ ) phonon mode. These selection rules correspond to the following product of matrix elements:

$$\langle f | H_{e-p} | m_1 \rangle \langle m_1 | H_{e-ph} | m_2 \rangle \langle m_2 | H_{e-p} | i \rangle, \text{ with } |f\rangle = |i\rangle$$

1-layer WTe<sub>2</sub>

| $aa$        |                             | $bb$        |                             |
|-------------|-----------------------------|-------------|-----------------------------|
| $ i\rangle$ | $ m_1\rangle =  m_2\rangle$ | $ i\rangle$ | $ m_1\rangle =  m_2\rangle$ |
| $A_g$       | $B_u$                       | $A_g$       | $A_u$                       |
| $B_g$       | $A_u$                       | $B_g$       | $B_u$                       |
| $A_u$       | $B_g$                       | $A_u$       | $A_g$                       |
| $B_u$       | $A_g$                       | $B_u$       | $B_g$                       |

$N$ -layer WTe<sub>2</sub> ( $N \geq 2$ )

| $aa$        |                             | $bb$        |                             |
|-------------|-----------------------------|-------------|-----------------------------|
| $ i\rangle$ | $ m_1\rangle =  m_2\rangle$ | $ i\rangle$ | $ m_1\rangle =  m_2\rangle$ |
| $A'$        | $A'$                        | $A'$        | $A''$                       |
| $A''$       | $A''$                       | $A''$       | $A'$                        |

Bulk WTe<sub>2</sub>

| $aa$        |                             | $bb$        |                             |
|-------------|-----------------------------|-------------|-----------------------------|
| $ i\rangle$ | $ m_1\rangle =  m_2\rangle$ | $ i\rangle$ | $ m_1\rangle =  m_2\rangle$ |
| $A_1$       | $B_1$                       | $A_1$       | $B_2$                       |
| $A_2$       | $B_2$                       | $A_2$       | $B_1$                       |
| $B_1$       | $A_1$                       | $B_1$       | $A_2$                       |
| $B_2$       | $A_2$                       | $B_2$       | $A_1$                       |

**Table S2.** Selection rules for intermediate states  $m_1$  and  $m_2$  for a given initial state  $i$ , and polarization vector  $ab$  or  $ba$  which both correspond to the excitation of  $B_g$  ( $A''$ ,  $A_2$ ) phonon from monolayer to bulk  $WTe_2$ , These selection rules correspond to the following product of matrix elements:  $\langle f | H_{e-p} | m_1 \rangle \langle m_1 | H_{e-ph} | m_2 \rangle \langle m_2 | H_{e-p} | i \rangle$ , with  $|f\rangle = |i\rangle$

1-layer  $WTe_2$

| $ab$        |               |               | $ba$        |               |               |
|-------------|---------------|---------------|-------------|---------------|---------------|
| $ i\rangle$ | $ m_1\rangle$ | $ m_2\rangle$ | $ i\rangle$ | $ m_1\rangle$ | $ m_2\rangle$ |
| $A_g$       | $B_u$         | $A_u$         | $A_g$       | $A_u$         | $B_u$         |
| $B_g$       | $A_u$         | $B_u$         | $B_g$       | $B_u$         | $A_u$         |
| $A_u$       | $B_g$         | $A_g$         | $A_u$       | $A_g$         | $B_g$         |
| $B_u$       | $A_g$         | $B_g$         | $B_u$       | $B_g$         | $A_g$         |

$N$ -layer  $WTe_2$  ( $N \geq 2$ )

| $ab$        |               |               | $ba$        |               |               |
|-------------|---------------|---------------|-------------|---------------|---------------|
| $ i\rangle$ | $ m_1\rangle$ | $ m_2\rangle$ | $ i\rangle$ | $ m_1\rangle$ | $ m_2\rangle$ |
| $A'$        | $A'$          | $A''$         | $A'$        | $A''$         | $A'$          |
| $A''$       | $A''$         | $A'$          | $A''$       | $A'$          | $A''$         |

Bulk  $WTe_2$

| $ab$        |               |               | $ba$        |               |               |
|-------------|---------------|---------------|-------------|---------------|---------------|
| $ i\rangle$ | $ m_1\rangle$ | $ m_2\rangle$ | $ i\rangle$ | $ m_1\rangle$ | $ m_2\rangle$ |
| $A_1$       | $B_1$         | $B_2$         | $A_1$       | $B_2$         | $B_1$         |
| $A_2$       | $B_2$         | $B_1$         | $A_2$       | $B_1$         | $B_2$         |
| $B_1$       | $A_1$         | $A_2$         | $B_1$       | $A_2$         | $A_1$         |
| $B_2$       | $A_2$         | $A_1$         | $B_2$       | $A_1$         | $A_2$         |
